# Supplementary material
Source: PubMed Central journal article supplement (PMC5875328)
Supplement: jamapediatr-172-423-s001.pdf [file jamapediatr-172-423-s001.pdf]

## Supplementary Online Content

Quinn PD, Hur K, Chang Z, et al. Association of mental health conditions and treatments with long-term opioid analgesic receipt among adolescents. *JAMA Pediatr*. Published online March 12, 2018. doi:10.1001/jamapediatrics.2017.5641

**eTable 1.** *International Classification of Diseases, Ninth Revision (ICD-9) Codes*

**eTable 2.** Generic Drug Names

**eTable 3.** Prior Mental Health Prevalence for Long-term Follow-up Sample

**eTable 4.** Prior Mental Health Conditions and Treatments Among Adolescents With and Without Prior Opioid Use Disorder

**eTable 5.** Opioid Analgesic and Opioid Use Disorder Medication Receipt in Follow-up Among Adolescents With and Without Prior Opioid Use Disorder

**eTable 6.** Pain Condition Cohort and Test of Proportional Hazards

**eTable 7.** Additional Sensitivity Analyses

This supplementary material has been provided by the authors to give readers additional information about their work.

**eTable 1. International Classification of Diseases, Ninth Revision (ICD-9) Codes**

| <b>Diagnosis</b>                                             | <b>ICD-9 Codes</b>                                                                                                                                                                                                   |
|--------------------------------------------------------------|----------------------------------------------------------------------------------------------------------------------------------------------------------------------------------------------------------------------|
| Attention-deficit/hyperactivity disorder                     | 314.xx                                                                                                                                                                                                               |
| Anxiety disorder                                             | 300.0x, 300.21, 300.22, 300.23, 300.3, 308.3, 309.81                                                                                                                                                                 |
| Bipolar and other mood disorder                              | 296.0x, 296.1x, 296.4x, 296.5x, 296.6x, 296.7, 296.8x, 296.9x                                                                                                                                                        |
| Cancer                                                       | 140.x-172.x, 174.x-209.xx, 235.x-239.xx, 338.3                                                                                                                                                                       |
| Depressive disorder                                          | 296.2x, 296.3x, 300.4, 311                                                                                                                                                                                           |
| Non-opioid substance use disorder                            | 291.xx, 292.xx, 303.xx, 304.1x-304.6x, 304.8x-304.9x, 305.0x, 305.2x-305.4x, 305.6x-305.9x                                                                                                                           |
| Opioid use disorder                                          | 304.0x, 304.7x, 305.5x                                                                                                                                                                                               |
| Painful condition                                            | Musculoskeletal: 710.x-739.x<br>Other neck/back: 756.10, 756.11, 756.12, 756.13, 756.19, 805.4, 805.8, 839.0x, 839.1x, 839.2x, 839.42, 846.x, 847.0, 847.1, 847.2, 847.3, 847.9<br>Headache/migraine: 307.81, 346.xx |
| Schizophrenia spectrum disorder                              | 295.xx, 297.x, 298.x                                                                                                                                                                                                 |
| Sleep disorder                                               | 307.4x, 327.xx, 347.xx, 780.5x                                                                                                                                                                                       |
| Suicide attempt or other self-injury (definite or uncertain) | E95x.x, E98x.x                                                                                                                                                                                                       |

**eTable 2. Generic Drug Names**

| <b>Medication Class</b>                             | <b>Generic Name (Alone or in Combination)</b>                                                                                                                                                                                                                                                                                                                                                    |
|-----------------------------------------------------|--------------------------------------------------------------------------------------------------------------------------------------------------------------------------------------------------------------------------------------------------------------------------------------------------------------------------------------------------------------------------------------------------|
| Attention-deficit/hyperactivity disorder medication | amphetamine, atomoxetine, dexamethylphenidate, dextroamphetamine, lisdexamfetamine, methamphetamine, methylphenidate                                                                                                                                                                                                                                                                             |
| Antipsychotic                                       | aripiprazole, asenapine, chlorpromazine, clozapine, fluphenazine, haloperidol, iloperidone, loxapine, lurasidone, molindone, olanzapine, paliperidone, perphenazine, pimozide, quetiapine, risperidone, thioridazine, thiothixene, trifluoperazine, ziprasidone                                                                                                                                  |
| Benzodiazepine                                      | alprazolam, chlordiazepoxide, clobazam, clonazepam, clorazepate, diazepam, estazolam, flurazepam, lorazepam, oxazepam, temazepam, triazolam                                                                                                                                                                                                                                                      |
| Mood stabilizer                                     | lamotrigine, lithium                                                                                                                                                                                                                                                                                                                                                                             |
| Non-benzodiazepine hypnotic                         | eszopiclone, zaleplon, zolpidem                                                                                                                                                                                                                                                                                                                                                                  |
| Opioid                                              | buprenorphine (transdermal Butrans only), butorphanol, codeine, dihydrocodeine, fentanyl LA, fentanyl SA, hydrocodone LA, hydrocodone SA, hydromorphone LA, hydromorphone SA, levorphanol, meperidine, methadone, morphine LA, morphine SA, opium, oxycodone LA, oxycodone SA, oxymorphone LA, oxymorphone SA, pentazocine, propoxyphene, tapentadol LA, tapentadol SA, tramadol LA, tramadol SA |
| Opioid use disorder medication                      | buprenorphine (excluding Butrans, Buprenex), naltrexone                                                                                                                                                                                                                                                                                                                                          |
| Serotonin-norepinephrine reuptake inhibitor         | desvenlafaxine, levomilnacipran, venlafaxine                                                                                                                                                                                                                                                                                                                                                     |
| Selective serotonin reuptake inhibitor              | citalopram, escitalopram, fluoxetine, fluvoxamine, paroxetine, sertraline                                                                                                                                                                                                                                                                                                                        |

Abbreviations: LA, long acting opioid; SA, short acting opioid

**eTable 3. Prior Mental Health Prevalence for Long-term Follow-up Sample**

| <b>Prior Mental Health Factor</b> | <b><i>n</i></b> | <b>%</b> |
|-----------------------------------|-----------------|----------|
| <b>Anxiety</b>                    |                 |          |
| Anxiety disorder                  | 50 739          | 5.1%     |
| Benzodiazepine                    | 22 572          | 2.3%     |
| <b>Mood</b>                       |                 |          |
| Bipolar/other mood disorder       | 23 387          | 2.3%     |
| Depressive disorder               | 72 493          | 7.2%     |
| Suicide attempt or self-injury    | 2306            | 0.2%     |
| Mood stabilizer                   | 8671            | 0.9%     |
| SNRI                              | 5008            | 0.5%     |
| SSRI                              | 67 727          | 6.8%     |
| <b>Neurodevelopment</b>           |                 |          |
| ADHD                              | 78 221          | 7.8%     |
| ADHD medication                   | 91 255          | 9.1%     |
| <b>Psychosis</b>                  |                 |          |
| Schizophrenia spectrum disorder   | 4386            | 0.4%     |
| Antipsychotic                     | 20 553          | 2.1%     |
| <b>Sleep</b>                      |                 |          |
| Sleep disorder                    | 16 760          | 1.7%     |
| Non-benzodiazepine hypnotic       | 4854            | 0.5%     |
| <b>Substance use</b>              |                 |          |
| Non-opioid SUD                    | 20 125          | 2.0%     |
| OUD                               | 1087            | 0.1%     |
| OUD medication                    | 347             | 0.03%    |
| <b>Psychotherapy</b>              |                 |          |
| For any diagnosis                 | 112 373         | 11.2%    |

Included *N* = 1 000 453. ADHD, attention-deficit/hyperactivity disorder. OUD, opioid use disorder. SNRI, serotonin-norepinephrine reuptake inhibitor. SSRI, selective serotonin reuptake inhibitor. SUD, substance use disorder.

**eTable 4. Prior Mental Health Conditions and Treatments Among Adolescents With and Without Prior Opioid Use Disorder**

| Prior Mental Health Factor      | Without Prior OUD<br>(n = 999 366) |                     | With Prior OUD<br>(n = 1087) |                     |
|---------------------------------|------------------------------------|---------------------|------------------------------|---------------------|
|                                 | n                                  | % (95% CI)          | n                            | % (95% CI)          |
| <b>Anxiety</b>                  |                                    |                     |                              |                     |
| Anxiety disorder                | 50 343                             | 5.0% (5.0%-5.1%)    | 396                          | 36.4% (33.6%-39.3%) |
| Benzodiazepine                  | 22 399                             | 2.2% (2.2%-2.3%)    | 173                          | 15.9% (13.7%-18.1%) |
| <b>Mood</b>                     |                                    |                     |                              |                     |
| Bipolar/other mood disorder     | 22 971                             | 2.3% (2.3%-2.3%)    | 416                          | 38.3% (35.4%-41.2%) |
| Depressive disorder             | 71 830                             | 7.2% (7.1%-7.2%)    | 663                          | 61.0% (58.1%-63.9%) |
| Suicide attempt or self-injury  | 2251                               | 0.2% (0.2%-0.2%)    | 55                           | 5.1% (3.8%-6.4%)    |
| Mood stabilizer                 | 8530                               | 0.9% (0.8%-0.9%)    | 141                          | 13.0% (11.0%-15.0%) |
| SNRI                            | 4944                               | 0.5% (0.5%-0.5%)    | 64                           | 5.9% (4.5%-7.3%)    |
| SSRI                            | 67 155                             | 6.7% (6.7%-6.8%)    | 572                          | 52.6% (49.7%-55.6%) |
| <b>Neurodevelopment</b>         |                                    |                     |                              |                     |
| ADHD                            | 77 838                             | 7.8% (7.7%-7.8%)    | 383                          | 35.2% (32.4%-38.1%) |
| ADHD medication                 | 90 871                             | 9.1% (9.0%-9.2%)    | 384                          | 35.3% (32.5%-38.2%) |
| <b>Psychosis</b>                |                                    |                     |                              |                     |
| Schizophrenia spectrum disorder | 4285                               | 0.4% (0.4%-0.4%)    | 101                          | 9.3% (7.6%-11.0%)   |
| Antipsychotic                   | 20 180                             | 2.0% (2.0%-2.1%)    | 373                          | 34.3% (31.5%-37.1%) |
| <b>Sleep</b>                    |                                    |                     |                              |                     |
| Sleep disorder                  | 16 657                             | 1.7% (1.6%-1.7%)    | 103                          | 9.5% (7.7%-11.2%)   |
| Non-benzodiazepine hypnotic     | 4784                               | 0.5% (0.5%-0.5%)    | 70                           | 6.4% (5.0%-7.9%)    |
| <b>Substance use</b>            |                                    |                     |                              |                     |
| Non-opioid SUD                  | 19 298                             | 1.9% (1.9%-2.0%)    | 827                          | 76.1% (73.5%-78.6%) |
| OUD medication                  | 241                                | 0.0% (0.0%-0.0%)    | 106                          | 9.8% (8.0%-11.5%)   |
| <b>Psychotherapy</b>            |                                    |                     |                              |                     |
| For any diagnosis               | 111 595                            | 11.2% (11.1%-11.2%) | 778                          | 71.6% (68.9%-74.3%) |

Included N = 1 000 453. ADHD, attention-deficit/hyperactivity disorder. OUD, opioid use disorder. SNRI, serotonin-norepinephrine reuptake inhibitor. SSRI, selective serotonin reuptake inhibitor. SUD, substance use disorder.

**eTable 5. Opioid Analgesic and Opioid Use Disorder Medication Receipt in Follow-up Among Adolescents With and Without Prior Opioid Use Disorder**

| Medication in Follow-up | Without Prior OUD<br>( <i>n</i> = 999 366) |                     | With Prior OUD<br>( <i>n</i> = 1087) |                     |
|-------------------------|--------------------------------------------|---------------------|--------------------------------------|---------------------|
|                         | <i>n</i>                                   | % (95% CI)          | <i>n</i>                             | % (95% CI)          |
| <b>Opioid</b>           |                                            |                     |                                      |                     |
| Hydrocodone             | 739 503                                    | 74.0% (73.9%-74.1%) | 789                                  | 72.6% (69.9%-75.2%) |
| Oxycodone               | 227 701                                    | 22.8% (22.7%-22.9%) | 299                                  | 27.5% (24.9%-30.2%) |
| Codeine                 | 198 309                                    | 19.8% (19.8%-19.9%) | 214                                  | 19.7% (17.3%-22.1%) |
| Tramadol                | 78 429                                     | 7.9% (7.8%-7.9%)    | 223                                  | 20.5% (18.1%-22.9%) |
| Propoxyphene            | 61 828                                     | 6.2% (6.1%-6.2%)    | 68                                   | 6.3% (4.8%-7.7%)    |
| Meperidine              | 7958                                       | 0.8% (0.8%-0.8%)    | 11                                   | 1.0% (0.4%-1.6%)    |
| Hydromorphone           | 4258                                       | 0.4% (0.4%-0.4%)    | 10                                   | 0.9% (0.4%-1.5%)    |
| Morphine                | 1553                                       | 0.2% (0.2%-0.2%)    | 7                                    | 0.6% (0.2%-1.1%)    |
| Tapentadol              | 1025                                       | 0.1% (0.1%-0.1%)    | 4                                    | 0.4% (0.0%-0.7%)    |
| Fentanyl                | 588                                        | 0.1% (0.1%-0.1%)    | 3                                    | 0.3% (0.0%-0.6%)    |
| Methadone               | 389                                        | 0.0% (0.0%-0.0%)    | 10                                   | 0.9% (0.4%-1.5%)    |
| Other opioids           | 1827                                       | 0.2% (0.2%-0.2%)    | 5                                    | 0.5% (0.1%-0.9%)    |
| <b>OUD medication</b>   |                                            |                     |                                      |                     |
| Any medication          | 3435                                       | 0.3% (0.3%-0.4%)    | 168                                  | 15.5% (13.3%-17.6%) |

Included *N* = 1 000 453. Adolescents without prior OUD had a median of 823 follow-up days (interquartile range [IQR], 440-1436), whereas those with prior OUD had a median of 672 follow-up days (IQR, 378-1113). OUD, opioid use disorder.

**eTable 6. Pain Condition Cohort and Test of Proportional Hazards**

| Prior Mental Health Factor          | Pain Cohort Model <sup>a</sup> | Proportional Hazards Test Model <sup>b</sup> |                                |
|-------------------------------------|--------------------------------|----------------------------------------------|--------------------------------|
|                                     | HR (95% CI)                    | HR at Index (95% CI)                         | Time Interaction <i>b</i> (SE) |
| <b>Anxiety disorder</b>             |                                |                                              |                                |
| Anxiety disorder                    | 2.25 (1.89-2.69)               | 3.11 (2.63-3.68)                             | -0.07 (0.03)                   |
| Benzodiazepine                      | 3.65 (3.03-4.39)               | 5.27 (4.37-6.36)                             | -0.15 (0.04)                   |
| <b>Mood</b>                         |                                |                                              |                                |
| Bipolar/other mood disorder         | 3.01 (2.43-3.73)               | 3.59 (2.90-4.45)                             | -0.04 (0.04)                   |
| Depressive disorder                 | 2.47 (2.14-2.86)               | 3.18 (2.77-3.66)                             | -0.03 (0.02)                   |
| Suicide attempt or self-injury      | 2.59 (1.23-5.44)               | 2.22 (0.99-4.97)                             | 0.20 (0.13)                    |
| Mood stabilizer                     | 2.73 (1.94-3.84)               | 3.51 (2.50-4.92)                             | -0.07 (0.06)                   |
| SNRI                                | 3.26 (2.25-4.72)               | 3.88 (2.68-5.62)                             | 0.00 (0.06)                    |
| SSRI                                | 2.61 (2.25-3.02)               | 3.23 (2.80-3.72)                             | -0.04 (0.02)                   |
| <b>Neurodevelopment</b>             |                                |                                              |                                |
| ADHD                                | 1.64 (1.38-1.94)               | 1.73 (1.46-2.05)                             | 0.00 (0.03)                    |
| ADHD medication                     | 1.59 (1.35-1.86)               | 1.62 (1.38-1.90)                             | 0.03 (0.03)                    |
| <b>Psychosis</b>                    |                                |                                              |                                |
| Schizophrenia spectrum disorder     | 2.35 (1.36-4.06)               | 2.50 (1.47-4.26)                             | 0.08 (0.08)                    |
| Antipsychotic                       | 3.37 (2.71-4.18)               | 3.87 (3.12-4.81)                             | -0.04 (0.04)                   |
| <b>Sleep</b>                        |                                |                                              |                                |
| Sleep disorder                      | 3.62 (2.90-4.51)               | 4.57 (3.62-5.78)                             | -0.14 (0.05)                   |
| Non-benzodiazepine hypnotic         | 6.33 (4.84-8.26)               | 8.90 (6.71-11.81)                            | -0.18 (0.06)                   |
| <b>Substance use</b>                |                                |                                              |                                |
| Non-opioid SUD                      | 3.49 (2.82-4.34)               | 4.44 (3.62-5.45)                             | -0.05 (0.04)                   |
| OUD                                 | 4.85 (2.31-10.21)              | 13.93 (8.23-23.57)                           | -0.32 (0.16)                   |
| OUD medication                      | 2.23 (0.31-15.83)              | 25.05 (10.96-57.21)                          | -1.83 (1.04)                   |
| <b>Psychotherapy</b>                |                                |                                              |                                |
| For any diagnosis                   | 2.03 (1.78-2.32)               | 2.16 (1.89-2.47)                             | -0.01 (0.02)                   |
|                                     |                                |                                              |                                |
| <b>Adolescents (n)</b>              | 229 913                        | 1 000 453                                    |                                |
| <b>Long-term opioid therapy (n)</b> | 1286                           | 2846                                         |                                |

All models adjusted for sex, index age, and index calendar year. ADHD, attention-deficit/hyperactivity disorder. HR, hazard ratio. OUD, opioid use disorder. SNRI, serotonin-norepinephrine reuptake inhibitor. SSRI, selective serotonin reuptake inhibitor. SUD, substance use disorder.

<sup>a</sup> Restricted to adolescents with past-90-day painful condition diagnoses.

<sup>b</sup> Included a linear follow-up time (in years) × mental health interaction.

**eTable 7. Additional Sensitivity Analyses**

| Prior Mental Health Factor          | Stricter Model <sup>a</sup> | Past-Year Model <sup>b</sup> | 2010 Model <sup>c</sup> |
|-------------------------------------|-----------------------------|------------------------------|-------------------------|
|                                     | HR (95% CI)                 | HR (95% CI)                  | HR (95% CI)             |
| <b>Anxiety</b>                      |                             |                              |                         |
| Anxiety disorder                    | 2.75 (2.26-3.36)            | 3.06 (2.67-3.50)             | 2.95 (2.11-4.14)        |
| Benzodiazepine                      | 3.79 (3.02-4.75)            | 4.47 (3.84-5.19)             | 5.26 (3.66-7.54)        |
| <b>Mood</b>                         |                             |                              |                         |
| Bipolar/other mood disorder         | 3.25 (2.51-4.20)            | 3.17 (2.64-3.81)             | 4.38 (2.94-6.51)        |
| Depressive disorder                 | 3.37 (2.89-3.93)            | 3.00 (2.68-3.35)             | 3.99 (3.02-5.27)        |
| Suicide attempt or self-injury      | 4.29 (1.78-10.34)           | 3.10 (1.39-6.91)             | 3.37 (0.84-13.54)       |
| Mood stabilizer                     | 3.26 (2.22-4.78)            | 3.04 (2.34-3.96)             | 4.26 (2.33-7.80)        |
| SNRI                                | 3.99 (2.70-5.90)            | 3.77 (2.80-5.09)             | 5.54 (2.46-12.46)       |
| SSRI                                | 2.86 (2.43-3.37)            | 2.99 (2.69-3.34)             | 4.30 (3.26-5.69)        |
| <b>Neurodevelopment</b>             |                             |                              |                         |
| ADHD                                | 1.77 (1.46-2.14)            | 1.62 (1.40-1.87)             | 1.61 (1.11-2.31)        |
| ADHD medication                     | 1.71 (1.43-2.04)            | 1.68 (1.49-1.90)             | 1.41 (0.98-2.02)        |
| <b>Psychosis</b>                    |                             |                              |                         |
| Schizophrenia spectrum disorder     | 2.51 (1.30-4.85)            | 3.58 (2.30-5.55)             | 3.00 (1.12-8.06)        |
| Antipsychotic                       | 4.04 (3.19-5.13)            | 3.54 (2.96-4.22)             | 3.72 (2.38-5.80)        |
| <b>Sleep</b>                        |                             |                              |                         |
| Sleep disorder                      | 3.81 (2.89-5.03)            | 3.95 (3.20-4.86)             | 4.57 (2.93-7.13)        |
| Non-benzodiazepine hypnotic         | 6.11 (4.38-8.53)            | 7.12 (5.65-8.97)             | 10.10 (5.99-17.04)      |
| <b>Substance use</b>                |                             |                              |                         |
| Non-opioid SUD                      | 3.96 (3.12-5.04)            | 4.07 (3.40-4.87)             | 4.88 (3.23-7.39)        |
| ODU                                 | 9.25 (4.61-18.58)           | 10.69 (6.80-16.79)           | 8.73 (2.80-27.23)       |
| ODU medication                      | 10.59 (3.41-32.90)          | 12.39 (5.90-26.03)           | -- <sup>d</sup>         |
| <b>Psychotherapy</b>                |                             |                              |                         |
| For any diagnosis                   | 2.05 (1.76-2.38)            | 2.12 (1.90-2.36)             | 2.62 (2.00-3.43)        |
|                                     |                             |                              |                         |
| <b>Adolescents (n)</b>              | 1 000 453                   | 1 000 453                    | 107 212                 |
| <b>Long-term opioid therapy (n)</b> | 1062                        | 2846                         | 278                     |

All models adjusted for sex, index age, and (except 2010 model) index calendar year. ADHD, attention-deficit/hyperactivity disorder. HR, hazard ratio. OUD, opioid use disorder. SNRI, serotonin-norepinephrine reuptake inhibitor. SSRI, selective serotonin reuptake inhibitor. SUD, substance use disorder.

<sup>a</sup> Cox proportional hazards regression predicting stricter long-term definition (opioid supply every day within a 6-month window).

<sup>b</sup> Cox proportional hazards regression predicting long-term opioids from mental health in the year prior to first opioid receipt.

<sup>c</sup> Cox proportional hazards regression predicting long-term opioids among adolescents with first opioid receipt in 2010.

<sup>d</sup> Hazard ratio could not be estimated with meaningful precision because of insufficient power.
